# Supplementary material
Source: publisher site journal article supplement (https://www.dovepress.com/article/450599)
Supplement: Supplementary file 1 [file get_supplementary_file.php]

Table S1: Differentially expressed genes between acta2+ and acta2- macrophages at day 5.

| gene | cluster | geneFrequency | geneFrequencyOutsideCluster | geneFrequencySecondBest | geneFrequencyGlobal | secondBestClusterName | tfidf | idf | qval |
| --- | --- | --- | --- | --- | --- | --- | --- | --- | --- |
| Acta2 | Acta2+ | 0.218447 | 0 | 0 | 0.027858 | Acta2- | 0.782177 | 3.580634 | 3.1E-123 |
| Olfml3 | Acta2+ | 0.323625 | 0.233444 | 0.233444 | 0.244944 | Acta2- | 0.455251 | 1.406725 | 0.00198 |
| Ap3s1 | Acta2+ | 0.428803 | 0.34035 | 0.34035 | 0.35163 | Acta2- | 0.448174 | 1.045175 | 0.008172 |
| Cwc15 | Acta2+ | 0.496764 | 0.399007 | 0.399007 | 0.411473 | Acta2- | 0.441132 | 0.888011 | 0.003458 |
| Slc11a1 | Acta2+ | 0.522654 | 0.427862 | 0.427862 | 0.43995 | Acta2- | 0.429147 | 0.821093 | 0.005194 |
| Glmp | Acta2+ | 0.592233 | 0.482971 | 0.482971 | 0.496905 | Acta2- | 0.414182 | 0.699357 | 0.000686 |
| Syngr1 | Acta2+ | 0.580906 | 0.486755 | 0.486755 | 0.498762 | Acta2- | 0.404094 | 0.695627 | 0.005942 |
| Swi5 | Acta2+ | 0.576052 | 0.485099 | 0.485099 | 0.496698 | Acta2- | 0.403105 | 0.699772 | 0.008208 |
| Rpl10-ps3 | Acta2+ | 0.61165 | 0.51088 | 0.51088 | 0.523731 | Acta2- | 0.395602 | 0.646777 | 0.0022 |
| Acta1 | Acta2+ | 0.200647 | 0.131268 | 0.131268 | 0.140116 | Acta2- | 0.39433 | 1.965288 | 0.005194 |
| Mif | Acta2+ | 0.613269 | 0.514428 | 0.514428 | 0.527033 | Acta2- | 0.392794 | 0.640493 | 0.003134 |
| Gm10116 | Acta2+ | 0.66343 | 0.5421 | 0.5421 | 0.557573 | Acta2- | 0.38755 | 0.584161 | 6.38E-05 |
| Mylpf | Acta2+ | 0.194175 | 0.127956 | 0.127956 | 0.136401 | Acta2- | 0.386826 | 1.992155 | 0.007548 |
| Cd9 | Acta2+ | 0.627832 | 0.530747 | 0.530747 | 0.543128 | Acta2- | 0.383235 | 0.61041 | 0.003774 |
| Il10rb | Acta2+ | 0.626214 | 0.537133 | 0.537133 | 0.548494 | Acta2- | 0.376091 | 0.60058 | 0.009641 |
| Use1 | Acta2+ | 0.635922 | 0.547304 | 0.547304 | 0.558605 | Acta2- | 0.370306 | 0.582313 | 0.009759 |
| Tmed2 | Acta2+ | 0.65534 | 0.561258 | 0.561258 | 0.573256 | Acta2- | 0.364646 | 0.556422 | 0.00511 |
| Sptssa | Acta2+ | 0.673139 | 0.572138 | 0.572138 | 0.585019 | Acta2- | 0.360878 | 0.536112 | 0.001539 |
| Rab5c | Acta2+ | 0.661812 | 0.570956 | 0.570956 | 0.582542 | Acta2- | 0.357613 | 0.540353 | 0.006784 |
| Gm9843 | Acta2+ | 0.705502 | 0.604541 | 0.604541 | 0.617416 | Acta2- | 0.340201 | 0.482212 | 0.001473 |
| Aprt | Acta2+ | 0.728155 | 0.630558 | 0.630558 | 0.643005 | Acta2- | 0.321556 | 0.441603 | 0.001539 |
| C3ar1 | Acta2+ | 0.749191 | 0.665799 | 0.665799 | 0.676434 | Acta2- | 0.292874 | 0.39092 | 0.008674 |
| Gusb | Acta2+ | 0.7589 | 0.675733 | 0.675733 | 0.686339 | Acta2- | 0.285637 | 0.376383 | 0.008208 |
| 2010107E04Rik | Acta2+ | 0.78479 | 0.687086 | 0.687086 | 0.699546 | Acta2- | 0.280424 | 0.357324 | 0.000686 |
| Vdac2 | Acta2+ | 0.78479 | 0.700331 | 0.700331 | 0.711102 | Acta2- | 0.267566 | 0.340939 | 0.005194 |
| Myl4 | Acta2+ | 0.076052 | 0.035478 | 0.035478 | 0.040652 | Acta2- | 0.243571 | 3.202705 | 0.006784 |
| Myl12a | Acta2+ | 0.81068 | 0.732971 | 0.732971 | 0.742881 | Acta2- | 0.24095 | 0.29722 | 0.008208 |
| Selk | Acta2+ | 0.83657 | 0.761589 | 0.761589 | 0.771151 | Acta2- | 0.2174 | 0.25987 | 0.007982 |
| Timp2 | Acta2+ | 0.87055 | 0.79754 | 0.79754 | 0.806851 | Acta2- | 0.186834 | 0.214616 | 0.00511 |
| Trem2 | Acta2+ | 0.889968 | 0.809603 | 0.809603 | 0.819851 | Acta2- | 0.176776 | 0.198632 | 0.000686 |
| C1qa | Acta2+ | 0.902913 | 0.830416 | 0.830416 | 0.839662 | Acta2- | 0.15779 | 0.174756 | 0.001539 |
| Ms4a7 | Acta2+ | 0.914239 | 0.83964 | 0.83964 | 0.849154 | Acta2- | 0.149492 | 0.163515 | 0.000686 |
| C1qc | Acta2+ | 0.917476 | 0.842952 | 0.842952 | 0.852456 | Acta2- | 0.14646 | 0.159634 | 0.000686 |
| Snx5 | Acta2+ | 0.907767 | 0.844607 | 0.844607 | 0.852662 | Acta2- | 0.144691 | 0.159392 | 0.006784 |
| Cd63 | Acta2+ | 0.911003 | 0.84508 | 0.84508 | 0.853487 | Acta2- | 0.144325 | 0.158424 | 0.003793 |
| C1qb | Acta2+ | 0.932039 | 0.866604 | 0.866604 | 0.874948 | Acta2- | 0.124511 | 0.13359 | 0.001473 |
| Aif1 | Acta2+ | 0.933657 | 0.876774 | 0.876774 | 0.884028 | Acta2- | 0.115089 | 0.123266 | 0.006485 |
| Clk1 | Acta2- | 0.389073 | 0.294498 | 0.294498 | 0.377012 | Acta2+ | 0.379532 | 0.975478 | 0.006594 |
| Prrc2c | Acta2- | 0.32403 | 0.224919 | 0.224919 | 0.311391 | Acta2+ | 0.378048 | 1.166706 | 0.000889 |
| Rpl27 | Acta2- | 0.441343 | 0.328479 | 0.328479 | 0.42695 | Acta2+ | 0.375622 | 0.851088 | 0.000265 |
| Rps12 | Acta2- | 0.446783 | 0.326861 | 0.326861 | 0.43149 | Acta2+ | 0.375526 | 0.840511 | 5.49E-05 |
| Fau | Acta2- | 0.476821 | 0.351133 | 0.351133 | 0.460792 | Acta2+ | 0.369445 | 0.774808 | 2.28E-05 |
| Rps27 | Acta2- | 0.488647 | 0.357605 | 0.357605 | 0.471936 | Acta2+ | 0.366931 | 0.750913 | 1.07E-05 |
| Plac8 | Acta2- | 0.23983 | 0.152104 | 0.152104 | 0.228642 | Acta2+ | 0.353892 | 1.475597 | 0.001021 |
| Traf1 | Acta2- | 0.161779 | 0.090615 | 0.090615 | 0.152703 | Acta2+ | 0.304024 | 1.879259 | 0.002386 |


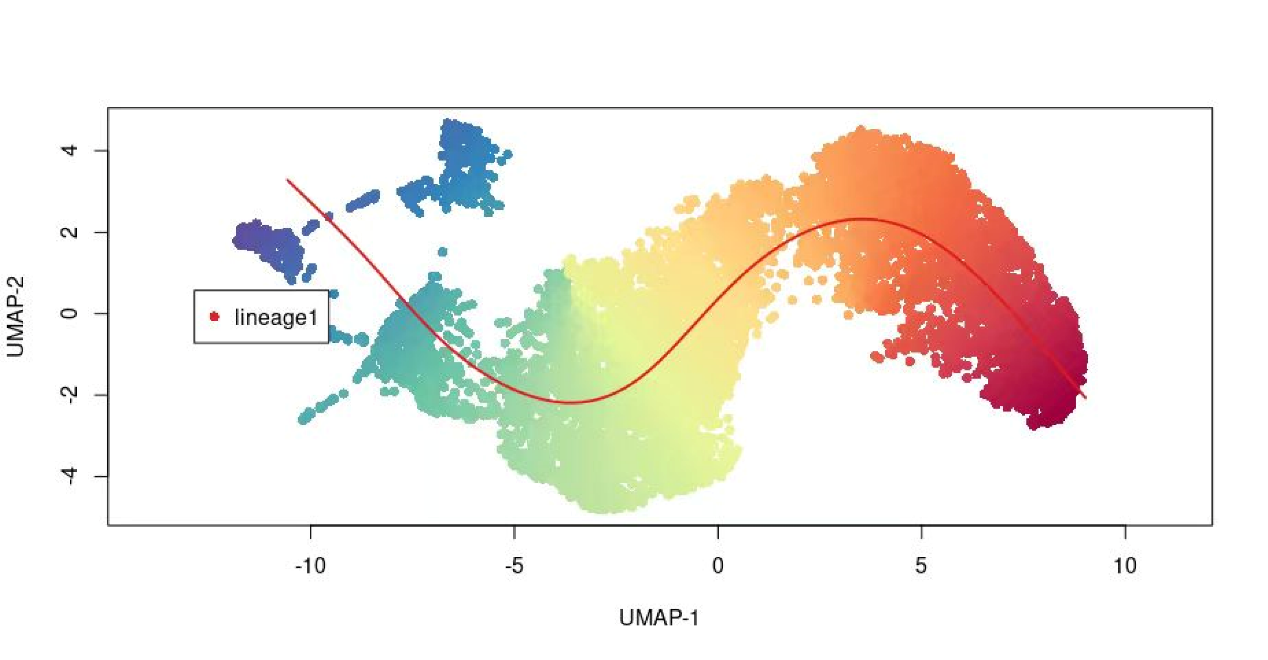


Figure S1. The developmental trajectory of macrophages indicates a shift from D2 (right red dots) to D5 (left blue dots).


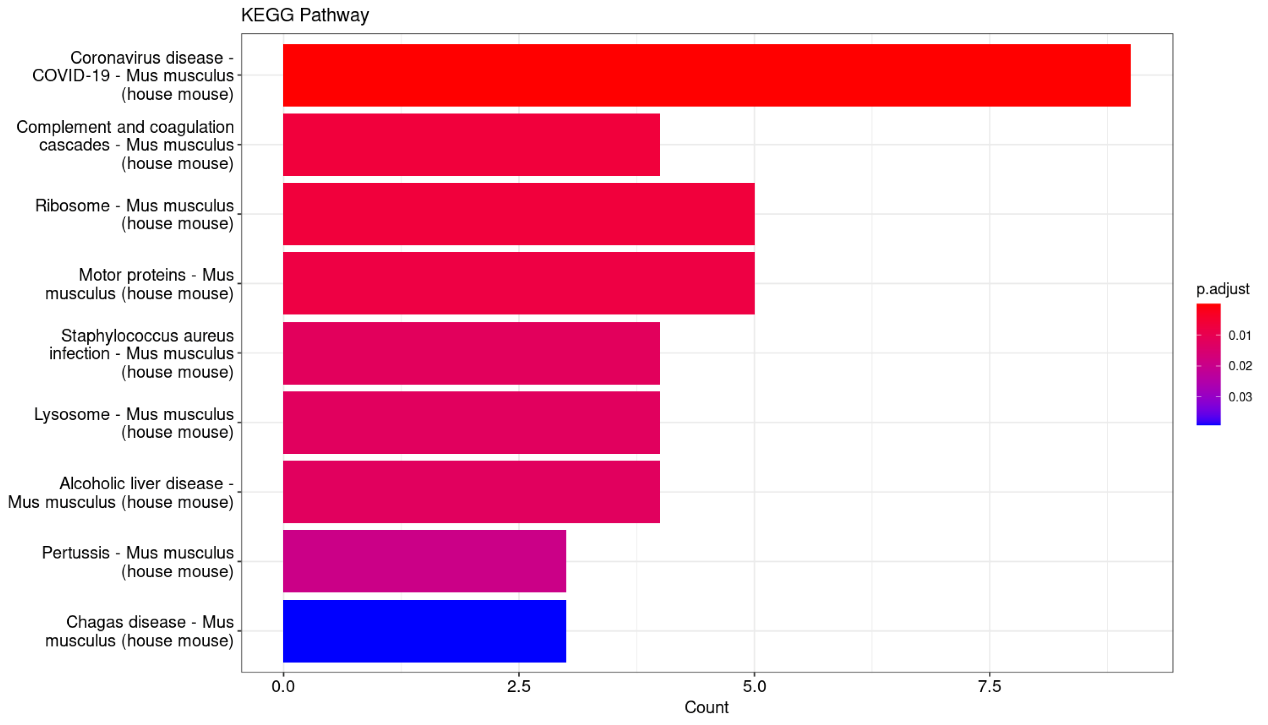


Figure S2. Functional enrichment analysis based on KEGG.


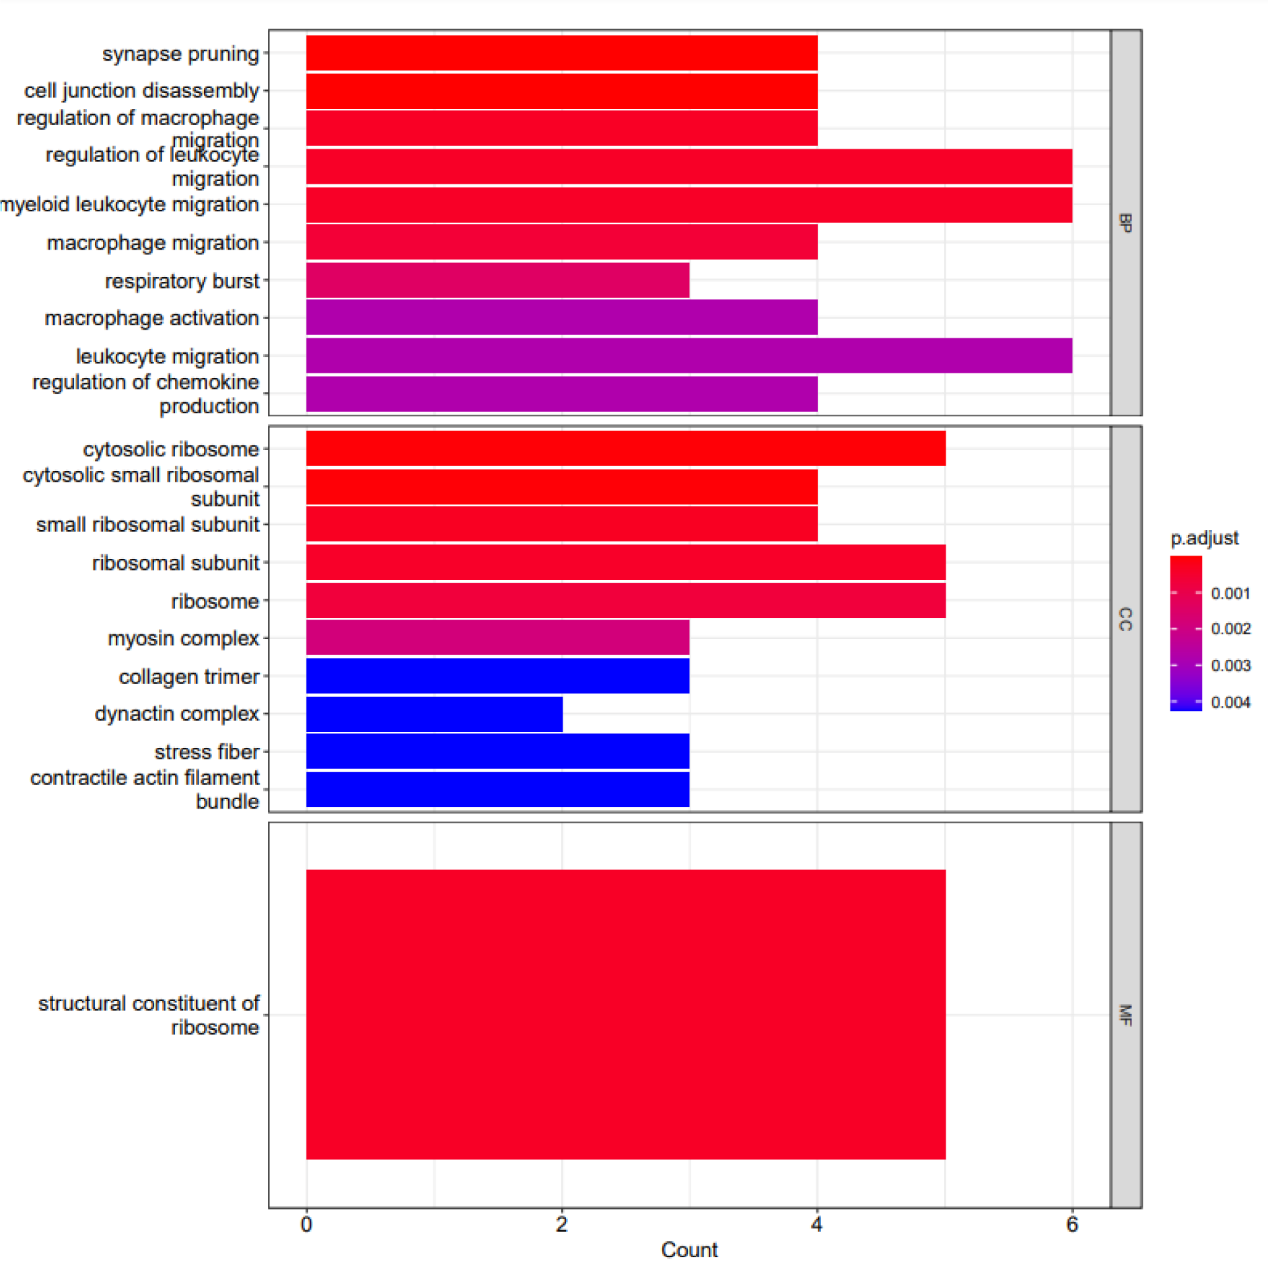


Figure S3. Functional enrichment analysis based on GO.


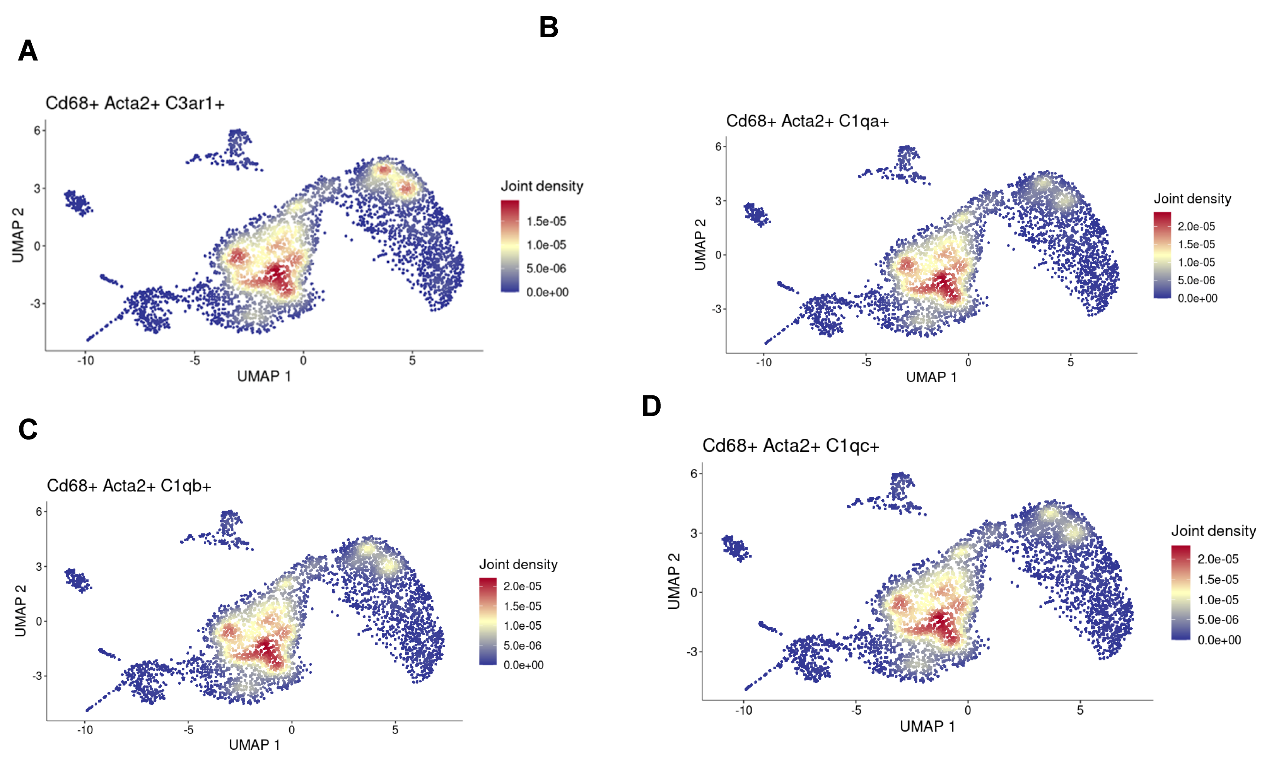


Figure S4. The expression distribution of characteristic genes in macrophages. Plot_Density_Joint_Only to demonstrate distribution of Cd68+Acta2+C3ar1+(A), Cd68+Acta2+C1qa+(B), CD68+Acta2+C1qb+(C), Cd68+Acta2+C1qc+(D) in macrophages.


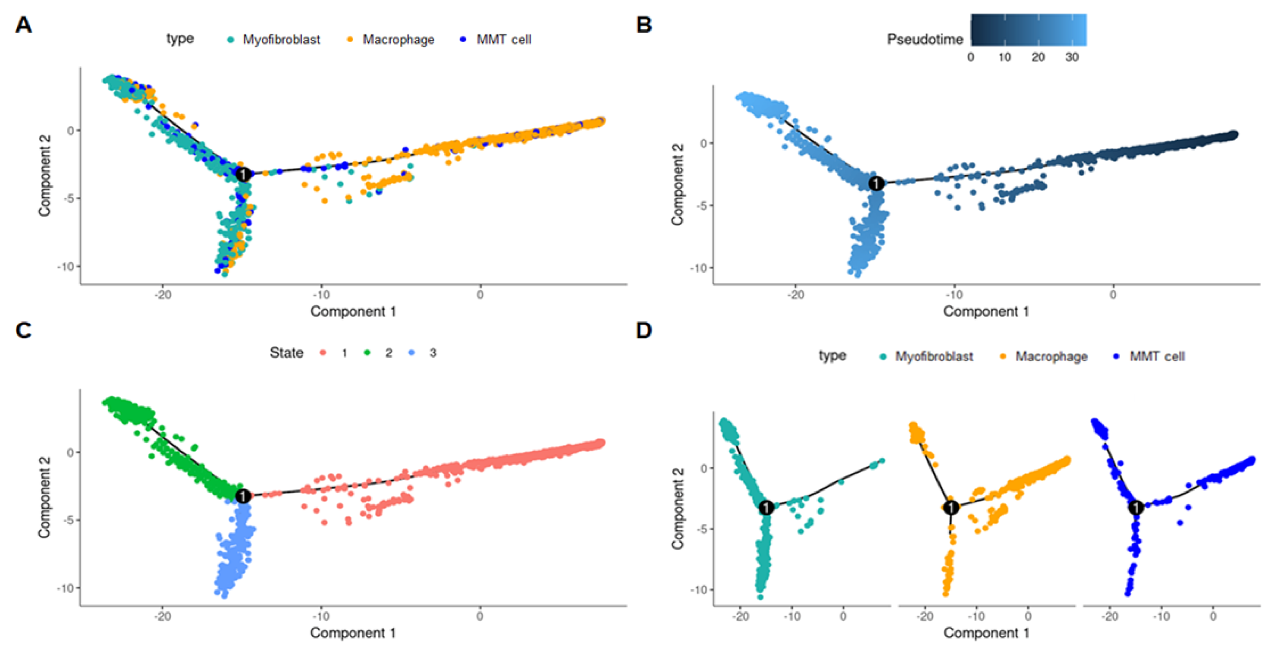


Figure S5. Pseudotime-based developmental trajectory of myofibroblast, macrophage and MMT cells inferred by analysis with Monocle 2. (A) Trajectory grouping by type. Macrophages mainly distributed on the right side of a trajectory, while myofibroblasts were in two branches on the left. MMTs distributed relatively evenly. (B) Trajectory grouping by pseudotime. The starting point of development was on the right, and the endpoint was on the left. (C) Trajectory grouping by state based on Monocle. (D) Separate distribution of myofibroblasts, macrophages, and MMT cells.


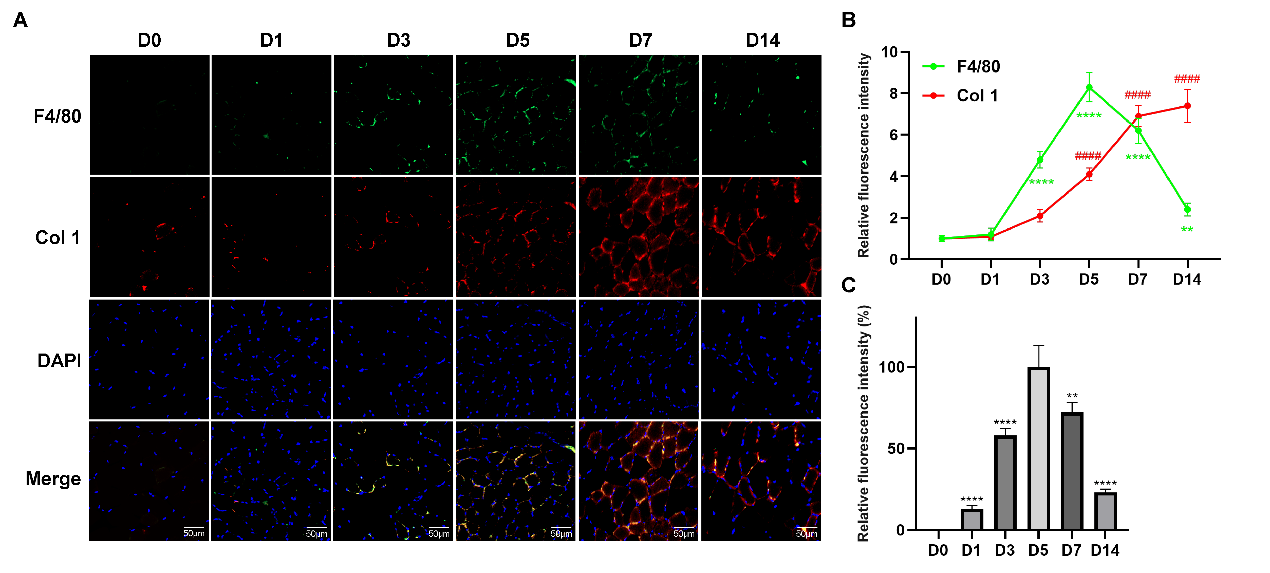


Figure S6. The macrophage-myofibroblast transition process in skeletal muscle after contusion. A. The representative immunofluorescence images demonstrated the location and relative expression of F4/80 and Col 1. B. Quantification of relative fluorescence intensity of F4/80 and Col 1 respectively. (n=6) Data was presented as mean ± SD. **p<0.01, ****p<0.0001, and ####p<0.0001 compared to the value of D0. C. Quantification of relative fluorescence intensity of co-expression of F4/80 and Col 1. (n=6) Data was presented as mean ± SD. **p<0.01, and ****p<0.0001 compared to the value of D5.


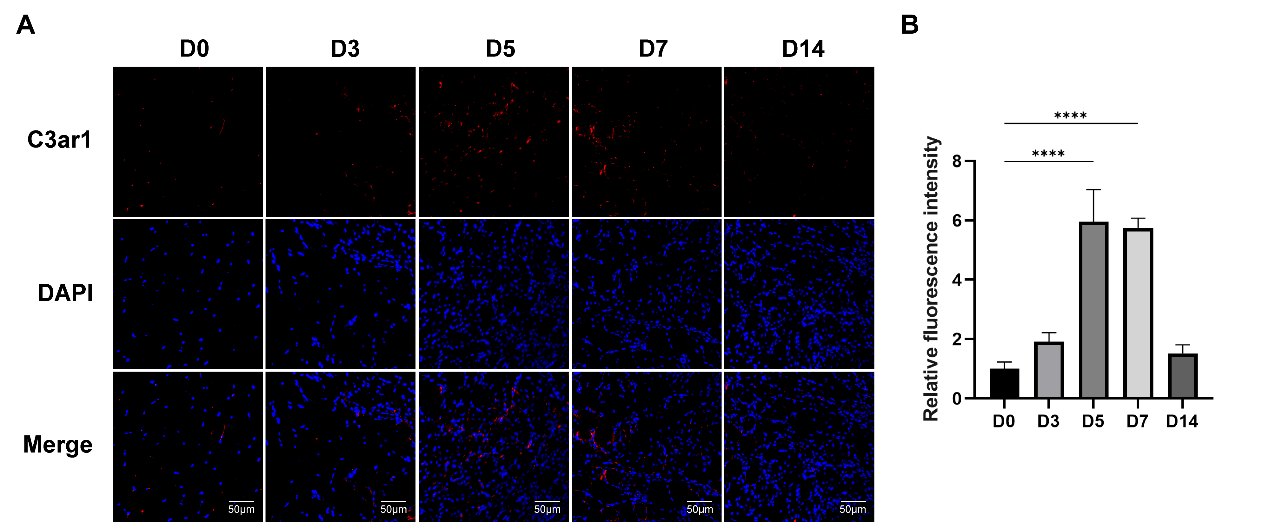


Figure S7. A. The representative immunofluorescence image demonstrated the expression and location of C3ar1. B. Quantification of relative fluorescence of C3ar1. (n=6) Data was presented as Mean ± SD. ****p<0.0001


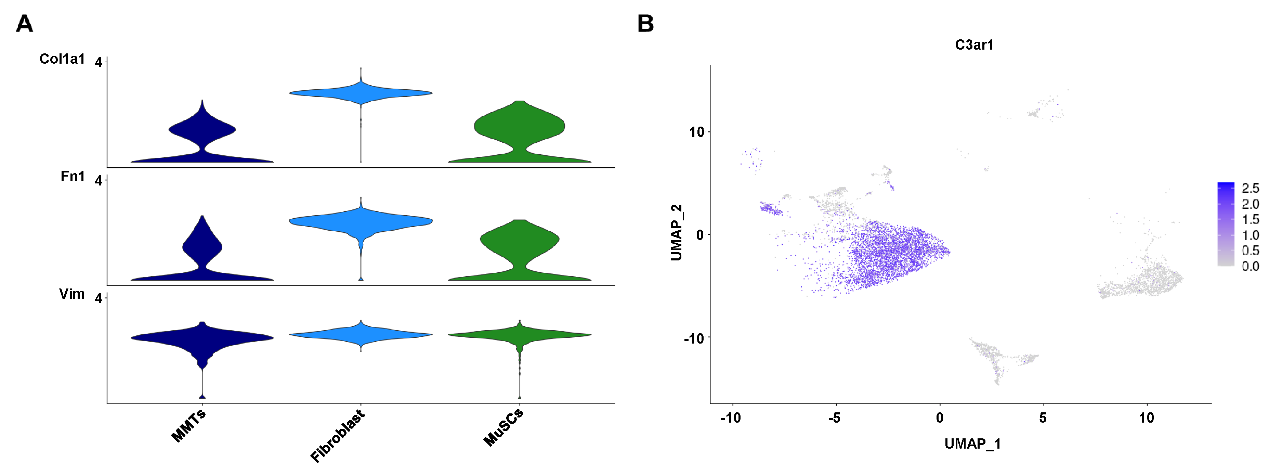


Figure S8. Bioinformatic analysis of two online datasets to detect the expression of different markers in MMT cells, fibroblasts, and MuSCs in skeletal muscle at D5 after injury. A. The expression Col1a1, Fn1, and Vim. B. The expression of C3ar1.
